# Supplementary material for: Investigating factors associated to HBV/HIV co-infected patients in antiretroviral treatment clinic, in Northeast Ethiopia
Source: Springer Nature journal article supplement (doi:10.1186/s12879-024-09355-4), 2024-05-01
Supplement: MOESM1 [file 27043620]

## English version questionnaire

Zemen Post Graduate Department of Public Health, Epidemiology and Biostatistics.

Questionnaire on proportion of HBsAg and associated factors on HIV positive adult.

INSTRUCTION: Circle/write the code corresponding to the answer for each question

Interviewer: Name \_\_\_\_\_ Father's name \_\_\_\_\_

Respondent's code \_\_\_\_\_

Date of the questioner filled (dd/mm/yy): \_\_\_\_/\_\_\_\_/\_\_\_\_

Start Time: \_\_\_\_/\_\_\_\_/: end Time \_\_\_\_/\_\_\_\_/

Part I: socio- demographic characteristics of respondents.

| No    | Question                    | Response                                                                                                                  | Skip to Q |
|-------|-----------------------------|---------------------------------------------------------------------------------------------------------------------------|-----------|
| Q101  | Sex                         | 1. Male<br>2. female                                                                                                      |           |
| Q 102 | Age(years old)              | _____                                                                                                                     |           |
| Q 103 | current occupational status | 1. Self-employed<br>2. student<br>3. House wife<br>4. Driver<br>5. others (specify)                                       |           |
| Q 104 | Marital status              | 1. Married<br>2. Single<br>3. Divorced                                                                                    |           |
| Q 105 | Educational level           | 1. Unable to read and write<br>2. Read and write only<br>3. Primary (1- 8)<br>4. Secondary (9-12)<br>5. College and above |           |
| Q 106 | Place of Residence          | 1. Urban<br>2. Rural                                                                                                      |           |

|       |                              |                 |  |
|-------|------------------------------|-----------------|--|
| Q 107 | Monthly average Income(ETB ) | -----<br>---ETB |  |
|-------|------------------------------|-----------------|--|

Part II: Questions concerning about “hepatitis B virus

| No    | Question                                                    | Response                       | Skip to Q |
|-------|-------------------------------------------------------------|--------------------------------|-----------|
| Q201  | Have you heard about HBV                                    | 1.yes<br>2.No                  |           |
| Q 202 | Have you ever received hepatitis B vaccine?                 | 1.yes<br>2.No                  |           |
| Q203  | History of STD/STI                                          | 1.Yes<br>2.No                  |           |
| Q 204 | History of Multiple sexual practice                         | 1.Yes<br>2.No                  |           |
| Q 205 | Is there regular sexual partner?                            | 1.Yes<br>2.No                  |           |
| Q 206 | If yes Having a conversation with yourpartner?              | 1.Yes<br>2.No                  |           |
| Q 207 | Consistent use of condom?                                   | 1.Yes<br>2.No                  |           |
| Q 208 | Have you ever received a blood transfusion?                 | 1.Yes<br>2. No                 |           |
| Q 209 | If yes “When did you receive your first blood transfusion?” | 1.Recentl<br>y2.pre<br>viously |           |
| Q 210 | (any Dental procedure)                                      | 1.Yes<br>2.No                  |           |

|       |                                      |               |  |
|-------|--------------------------------------|---------------|--|
| Q 211 | History of Hospital admission        | 1.Yes<br>2.No |  |
| Q 212 | Have you ever had Surgical procedure | 1.Yes<br>2.No |  |
| Q 213 | Ear piercing                         | 1.Yes<br>2.No |  |

| No    | Question                                                        | Response                   | Skip to Q |
|-------|-----------------------------------------------------------------|----------------------------|-----------|
| Q 214 | If yes "When                                                    | 1.Recently<br>2.Previously |           |
| Q215  | Tattooing on body                                               | 1.Yes<br>2.No              |           |
| Q 216 | alcohol consumption                                             | 1.Yes<br>2.No              |           |
| Q 217 | Sharing Shar                                                    | 1.Yes2.No                  |           |
| Q 218 | Do you have at least one HBsAg-positive family                  | 1.Yes2.No                  |           |
| Q 219 | Result of Hepatitis                                             | 1.postive<br>2.Negative    |           |
| Q 220 | Are you aware HBV is transmitted through blood and other bodily | 1.Yes2.No                  |           |

|       |                                        |               |  |
|-------|----------------------------------------|---------------|--|
|       | fluids?                                |               |  |
| Q 221 | Smoking                                | 1.Yes2.No     |  |
| Q 222 | Do you know prevention methods of HBV? | 1 Yes<br>2.No |  |

Part III: patient's Chart reviewing

| No    | Question                 | Response        | Skip toQ |
|-------|--------------------------|-----------------|----------|
| Q 301 | Current CD4 count        | 1.....cells/μl  |          |
| Q302  | Current Viral load level | 1-----copies/ml |          |
| Q 303 | History of OIs?          | 1.Yes<br>2.No   |          |
